# Supplementary material
Source: HighWire-hosted journal article supplement (https://cmaj.ca/highwire/filestream/58740/field_highwire_adjunct_files/0/salon-duffin-1-at.pdf)
Supplement: salon-duffin-1-at.pdf [file salon-duffin-1-at.pdf]

## Appendix 1: References for “Canadian drug shortage: recent history of a mystery”

### References

1. Canadian Medical Association. Generic prescription drug shortages. Ottawa (ON): The Association; 2011. Available: [www.cma.ca/advocacy/generic-prescription-drug-shortages](http://www.cma.ca/advocacy/generic-prescription-drug-shortages).
2. Duffin J, Gregg R, Biagi J, et al. Generic drug shortage a concern. *Kingston Whig Standard* 2010 Dec. 16. Available: [www.thewhig.com/ArticleDisplay.aspx?e=2904289&archive=](http://www.thewhig.com/ArticleDisplay.aspx?e=2904289&archive=)
3. Canadian Pharmacists Association. *Canadian drug shortages survey: final report*. Ottawa (ON): The Association; 2010. Available: [www.pharmacists.ca/cpha-ca/assets/File/cpha-on-the-issues/DrugShortagesReport](http://www.pharmacists.ca/cpha-ca/assets/File/cpha-on-the-issues/DrugShortagesReport).
4. Law MR, Cheng L, Dhalla IA, et al. The effect of cost on adherence to prescription medications in Canada. *CMAJ* 2012;184:297-302 Available: [www.cmaj.ca/content/184/3/297.full?sid=cdbf5309-603b-43ff-8d7d-](http://www.cmaj.ca/content/184/3/297.full?sid=cdbf5309-603b-43ff-8d7d-)
5. Prakash S. Sethi, *Group purchasing organizations: an undisclosed scandal in the U.S. healthcare industry*. Hampshire (UK): Palgrave Macmillan; 2009.
6. Earl P, Zweig PL. *Connecting the dots: How anticompetitive contracting practices, kickbacks, and self-dealing by hospital Group Purchasing Organizations (GPOs) caused the U.S. drug shortage*. Superior (CO): Superior Medical Supply Inc.; 2012. Available: [www.superiormedicalsupply.com/connecting-the-dots-how-anticompetitive-contracting-practices-kickbacks-and-self-dealing-by-hospital-group-purchasing-organizations-gpos-caused-the-u-s-drug-shortage](http://www.superiormedicalsupply.com/connecting-the-dots-how-anticompetitive-contracting-practices-kickbacks-and-self-dealing-by-hospital-group-purchasing-organizations-gpos-caused-the-u-s-drug-shortage)
